# Supplementary material for: Analysis of Storage Capacity Change and Dam Failure Risk for Tailings Ponds Using WebGIS-Based UAV 3D Image
Source: MDPI journal article supplement (doi:10.3390/su151914062), 2023-09-22
Supplement: s1 [file s1]

## supplementary material

# Analysis of storage capacity change and dam failure risk for tailings ponds using WebGIS-based UAV 3D image

Meihong Zhi<sup>1</sup>, Yun Zhu<sup>1,\*</sup>, Ji-Cheng Jang<sup>1</sup>, Shuxiao Wang<sup>2</sup>, Pen-Chi Chiang<sup>3,4</sup>, Chuang Su<sup>5</sup>, Shenglun Liang<sup>6</sup>, Ying Li<sup>7</sup>, Yingzhi Yuan<sup>1</sup>

<sup>1</sup> College of Environment and Energy, South China University of Technology, Guangzhou Higher Education Mega Center, Guangzhou 510006, China

<sup>2</sup> State Key Joint Laboratory of Environment Simulation and Pollution Control, School of Environment, Tsinghua University, Beijing, 100084, China

<sup>3</sup> Graduate Institute of Environmental Engineering, National Taiwan University, Taipei, 10673, Taiwan

<sup>4</sup> Carbon Cycle Research Center, National Taiwan University, Taipei 10672, Taiwan

<sup>5</sup> Solid Waste and Chemicals Environmental Center of Guangdong Province, Guangzhou 510308, China

<sup>6</sup> Cloud Information and Environmental Science Technology Company Limited, Foshan 528300, China

<sup>7</sup> Center for Satellite Application on Ecology and Environment, Ministry of Ecology and Environment, Beijing 100094, China

\* Correspondence: [zhuyun@scut.edu.cn](mailto:zhuyun@scut.edu.cn); Tel.: +86-13316253667

**Text S1.** Calculation method of flood regulation storage capacity.

According to the Safety Regulation for Tailings Pond (GB39496-2020) [1] in China, flood control standards for tailings ponds during different usage stages should be determined based on their grades, as presented in **Table S5**. According to the third-grade flood control standard, the flood return period of the tailings pond was 200 years, corresponding to a design frequency of 5%. Then the required flood regulation storage capacity of the tailings pond was calculated following **Equation (S1) to (S5)** [2].

$$H_{24P} = K_P \times \bar{H}_{24} \quad (S1)$$

$$W_{24P} = 1000\Psi H_{24P}F \quad (S2)$$

$$S_P = H_{24P} \times 24^{(n_3-1)} \quad (S3)$$

$$Q_P = 0.278(S_P - 1)F \quad (S4)$$

$$V_T = W_{24P} \times (1 - q_m/Q_P) \quad (S5)$$

Where  $H_{24P}$  is the 24-hour rainfall with a frequency of P, mm;  $K_P$  is the simulation rate coefficient, and the value can be obtained by referring to the corresponding table;  $\bar{H}_{24}$  is the average annual maximum rainfall for 24 hours, mm;  $W_{24P}$  is the total catchment flood amount for a rainfall duration of 24 hours with a frequency of P, m<sup>3</sup>;  $\Psi$  is the 24-hour flood runoff coefficient, which is the ratio of net rainfall to the average precipitation in the basin, taking 0.8;  $F$  is the catchment area, km<sup>2</sup>;  $S_P$  is the rainfall intensity with a frequency of P, mm/h;  $n_3$  is the rainstorm decline index, taking 0.793;  $Q_P$  is the flood peak flow with a frequency of P, m<sup>3</sup>/s.

**Table S1.** Grading standards for tailings ponds.

| Grade  | Whole storage capacity (10 <sup>4</sup> m <sup>3</sup> ) | Dam height (m) |
|--------|----------------------------------------------------------|----------------|
| First  | V≥50000                                                  | H≥200          |
| Second | 10000≤V<50000                                            | 100≤H<200      |
| Third  | 1000≤V<10000                                             | 60≤H<100       |
| Fourth | 100≤V<1000                                               | 30≤H<60        |
| Fifth  | V<100                                                    | H<30           |

**Table S2.** Detailed parameters of UAV flight route.

| Route | Route length (km) | Flight area (km <sup>2</sup> ) | Flight height (m) | Fore-and-aft overlap percentage (%) | Side overlap percentage (%) | UAV model  | Camera model       | Pixel (10 <sup>4</sup> ) | Sensor size (mm) | Focal length (mm) | Equivalent focal length (mm) |
|-------|-------------------|--------------------------------|-------------------|-------------------------------------|-----------------------------|------------|--------------------|--------------------------|------------------|-------------------|------------------------------|
| I     | 10.80             | 2.55                           | 200               | 80                                  | 70                          | Loong 2160 | SONY ILCE-5100     | 2430                     | 23.5             | 35.8              | 53.5                         |
| II    | 2.71              | 0.28                           | 130               | 80                                  | 70                          | DJI Mavic2 | Hasselblad L1D-20c | 2000                     | 13.2             | 10.4              | 28.4                         |

**Table S3.** GSPs data.

| Number | X (m)      | Y (m)       | Z (m)   |
|--------|------------|-------------|---------|
| KZ01   | 593985.080 | 2535095.037 | 264.512 |
| KZ02   | 593832.966 | 2535105.805 | 241.455 |
| KZ03   | 593684.168 | 2535326.455 | 215.248 |
| KZ04   | 593587.322 | 2535131.905 | 194.234 |
| KZ05   | 593584.016 | 2535023.109 | 183.351 |

|      |            |             |         |
|------|------------|-------------|---------|
| KZ06 | 593421.154 | 2535095.335 | 186.707 |
| JC01 | 593853.251 | 2535132.953 | 246.540 |
| JC02 | 593660.056 | 2535051.507 | 192.249 |
| JC03 | 593555.193 | 2535060.546 | 177.950 |
| JC04 | 593356.378 | 2535051.365 | 133.310 |

**Table S4.** Results of two phases of flight operations.

| Flight batch | Flight Date     | Route number | Flight time (min) | Photo quantity |
|--------------|-----------------|--------------|-------------------|----------------|
| Phase I      | 8 December 2021 | I            | 33                | 1315           |
|              |                 | II           | 75                | 923            |
|              |                 | Sum          | 108               | 2238           |
| Phase II     | 3 January 2023  | I            | 28                | 1310           |
|              |                 | II           | 71                | 920            |
|              |                 | Sum          | 99                | 2230           |

**Table S5.** Flood control standards for tailings ponds.

| Grade  | Flood return period (year)    |
|--------|-------------------------------|
| First  | 1000~5000 or PMF <sup>a</sup> |
| Second | 500~1000                      |
| Third  | 200~500                       |
| Fourth | 100~200                       |
| Fifth  | 100                           |

<sup>a</sup>PMF is the possible maximum flood.

**Table S6.** Requirements for minimum flood control dam width and minimum free height of dry tailings pond dams.

| Dam grade | Minimum flood control dam width (m) | Minimum free height (m) | Dam slope ratio |
|-----------|-------------------------------------|-------------------------|-----------------|
| First     | 100                                 | 1.5                     | <1:3            |
| Second    | 70                                  | 1.0                     |                 |
| Third     | 50                                  | 0.7                     |                 |
| Fourth    | 35                                  | 0.5                     |                 |
| Fifth     | 25                                  | 0.4                     |                 |

**Table S7.** Model coordinates of the four checkpoints, unit: m.

| Number | Phase I             |                     |                     | Phase II            |                     |                     |
|--------|---------------------|---------------------|---------------------|---------------------|---------------------|---------------------|
|        | X <sub>1model</sub> | Y <sub>1model</sub> | Z <sub>1model</sub> | X <sub>2model</sub> | Y <sub>2model</sub> | Z <sub>2model</sub> |
| JC01   | 593853.208          | 2535132.907         | 246.778             | 593853.201          | 2535132.815         | 246.668             |
| JC02   | 593660.137          | 2535051.698         | 192.044             | 593660.039          | 2535051.364         | 192.533             |
| JC03   | 593555.269          | 2535060.715         | 178.128             | 593555.275          | 2535060.539         | 177.757             |
| JC04   | 593356.523          | 2535051.168         | 133.146             | 593356.476          | 2535051.197         | 133.477             |

**Table S8.** Comprehensive summary of the error calibration results of the four checkpoints, unit: m.

| Number | Phase I      |              |              |              | Phase II     |              |              |              |
|--------|--------------|--------------|--------------|--------------|--------------|--------------|--------------|--------------|
|        | $\Delta X_1$ | $\Delta Y_1$ | $\Delta S_1$ | $\Delta Z_1$ | $\Delta X_2$ | $\Delta Y_2$ | $\Delta S_2$ | $\Delta Z_2$ |
| JC01   | 0.043        | 0.046        | 0.063        | -0.238       | 0.050        | 0.138        | 0.147        | -0.128       |
| JC02   | -0.081       | -0.191       | 0.207        | 0.205        | 0.017        | 0.143        | 0.144        | -0.284       |
| JC03   | -0.076       | -0.169       | 0.185        | -0.178       | -0.082       | 0.007        | 0.082        | 0.193        |
| JC04   | -0.145       | 0.197        | 0.245        | 0.164        | -0.098       | 0.168        | 0.194        | -0.167       |
| Max    | 0.145        | 0.197        | 0.245        | 0.238        | 0.098        | 0.168        | 0.194        | 0.284        |
| Min    | 0.043        | 0.046        | 0.063        | 0.164        | 0.017        | 0.007        | 0.082        | 0.128        |

|      |       |       |       |       |       |       |       |       |
|------|-------|-------|-------|-------|-------|-------|-------|-------|
| Avg  | 0.086 | 0.151 | 0.175 | 0.196 | 0.062 | 0.114 | 0.142 | 0.193 |
| RMSE | 0.094 | 0.163 | 0.188 | 0.198 | 0.069 | 0.130 | 0.147 | 0.201 |

**Table S9.** Calculation parameters of design rainstorm intensity.

| Flood control standard | Rainfall duration (hour) | $\bar{H}_{24}$ (mm) | $C_v$ | $C_s$    | $K_P$ | $H_{24P}$ (mm) | $S_P$ (mm/h) |
|------------------------|--------------------------|---------------------|-------|----------|-------|----------------|--------------|
| $P_{200}=0.5\%$        | 24                       | 190                 | 0.48  | $3.5C_v$ | 2.95  | 560.50         | 290.32       |

**Table S10.** Calculation results of flood regulation storage capacity.

| Flood return period (year) | Flood control standard | F (km <sup>2</sup> ) | $W_{24P}$ (m <sup>3</sup> ) | $Q_P$ (m <sup>3</sup> /s) | $q_m$ (m <sup>3</sup> /s) | $V_T$ (m <sup>3</sup> ) |
|----------------------------|------------------------|----------------------|-----------------------------|---------------------------|---------------------------|-------------------------|
| 200                        | $P_{200}=0.5\%$        | 0.19                 | 85196.00                    | 15.28                     | 8.50                      | 37808.22                |

**Table S11.** Summary results of measuring minimum flood control dam width and minimum free height, unit: m.

| Number  | Phase I                         |                     | Phase II                        |                     |
|---------|---------------------------------|---------------------|---------------------------------|---------------------|
|         | Minimum flood control dam width | Minimum free height | Minimum flood control dam width | Minimum free height |
| 1       | 79.76                           | 2.94                | 98.22                           | 0.85                |
| 2       | 79.98                           | 2.92                | 96.47                           | 0.91                |
| 3       | 79.05                           | 2.89                | 97.36                           | 0.89                |
| 4       | 80.25                           | 2.84                | 98.05                           | 0.82                |
| 5       | 79.91                           | 2.88                | 97.06                           | 0.88                |
| Average | 79.79                           | 2.89                | 97.43                           | 0.87                |
| SD      | 0.45                            | 0.04                | 0.72                            | 0.04                |

SD: standard deviation.

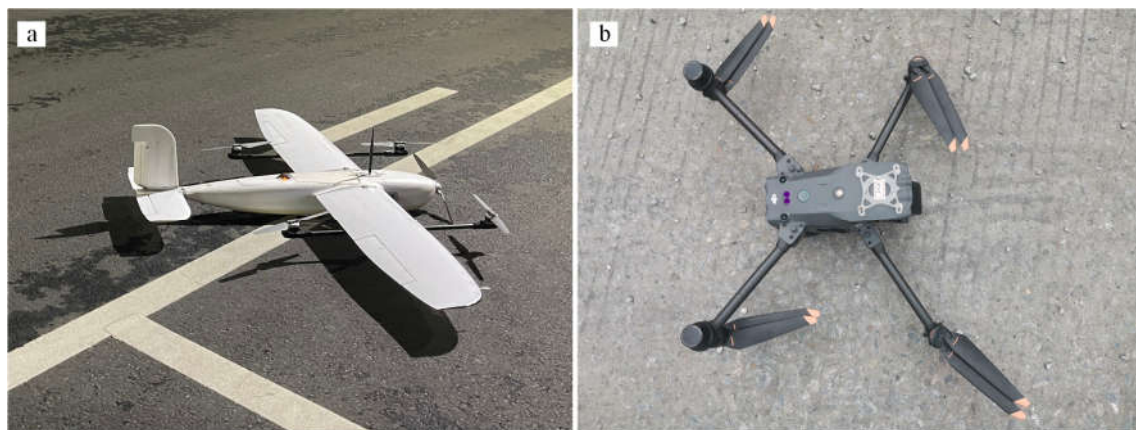

Figure S1. UAVs: (a) Loong 2160, (b) DJI Mavic2.

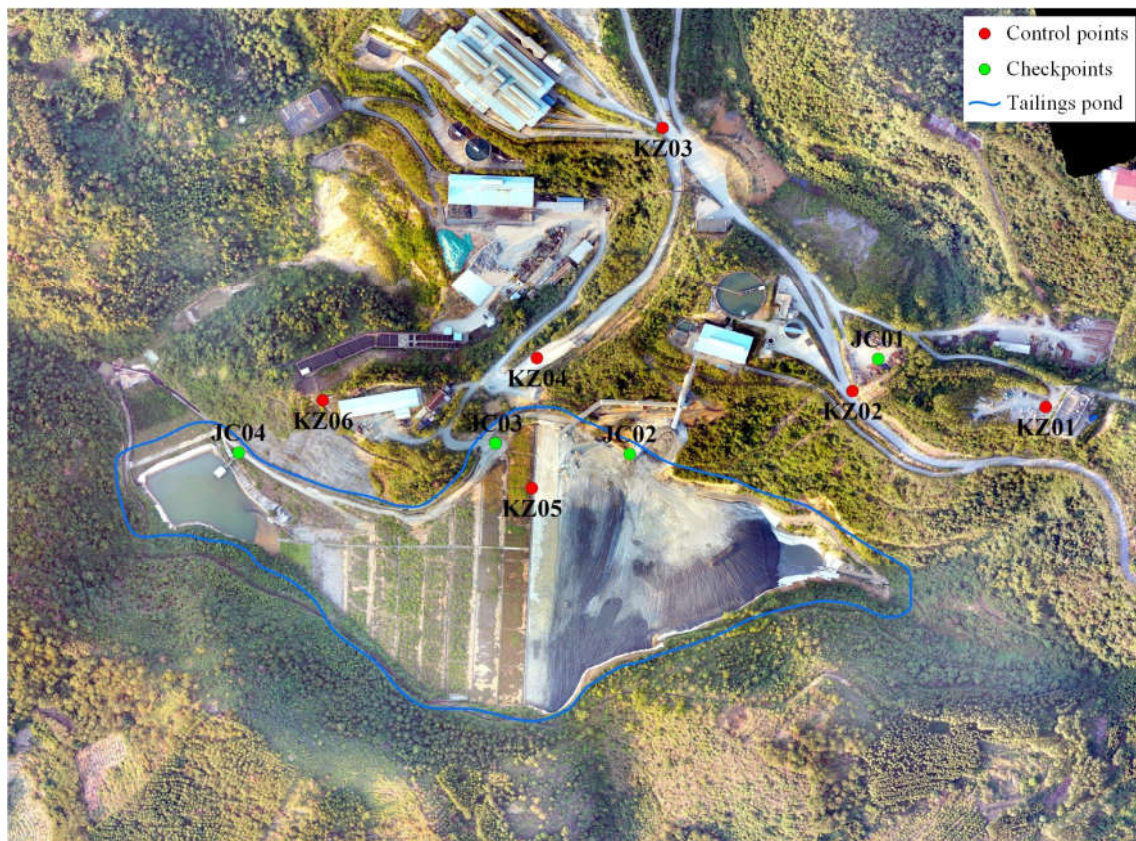



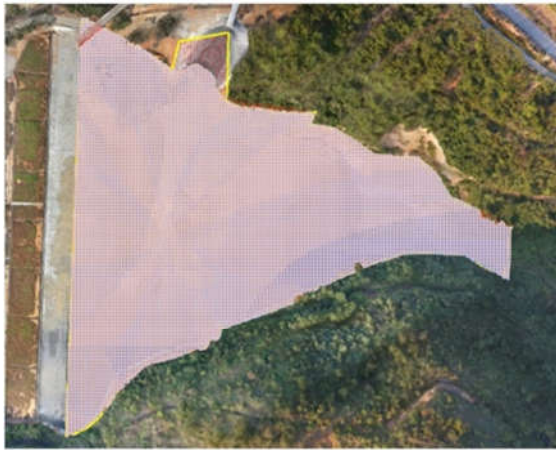

### Volume measurement

Cal

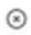

Height: 192.50 m

Sampling distance: 1.00 m

Cut volume: 5337.54566 m<sup>3</sup>

Fill volume: 204798.627974 m<sup>3</sup>

(a)

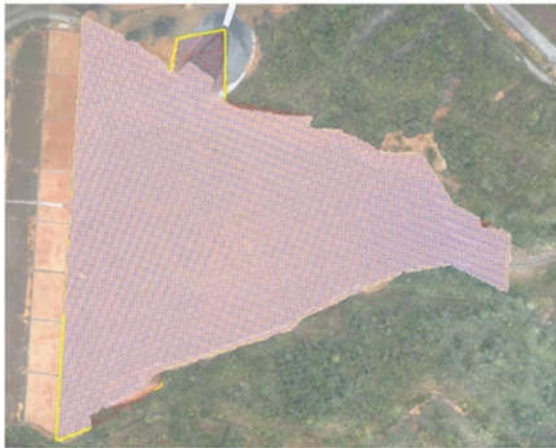

### Volume measurement

Cal

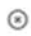

Height: 192.50 m

Sampling distance: 1.00 m

Cut volume: 6716.407424 m<sup>3</sup>

Fill volume: 148767.122403 m<sup>3</sup>

(b)

Figure S3. Measurements, (b)

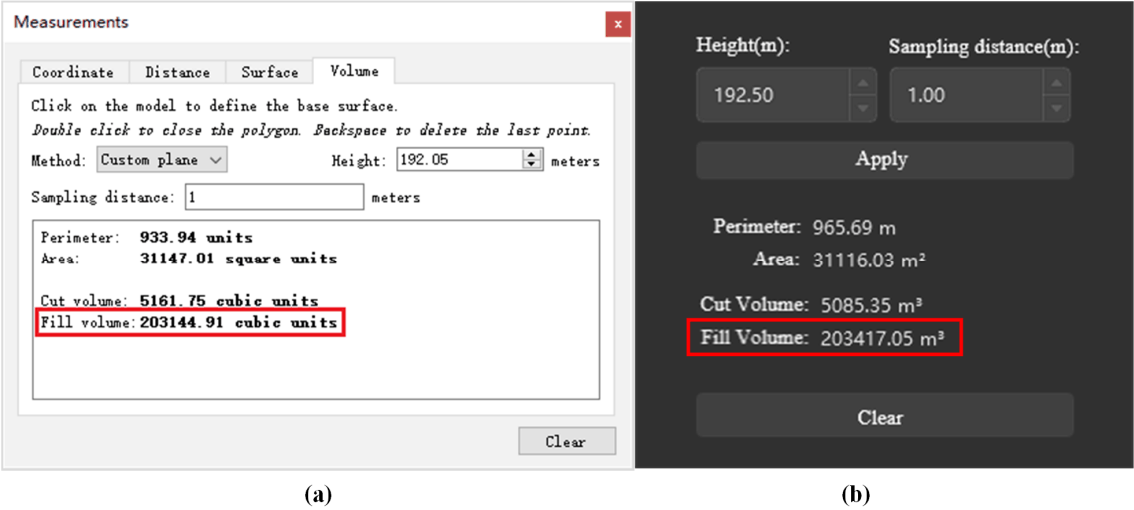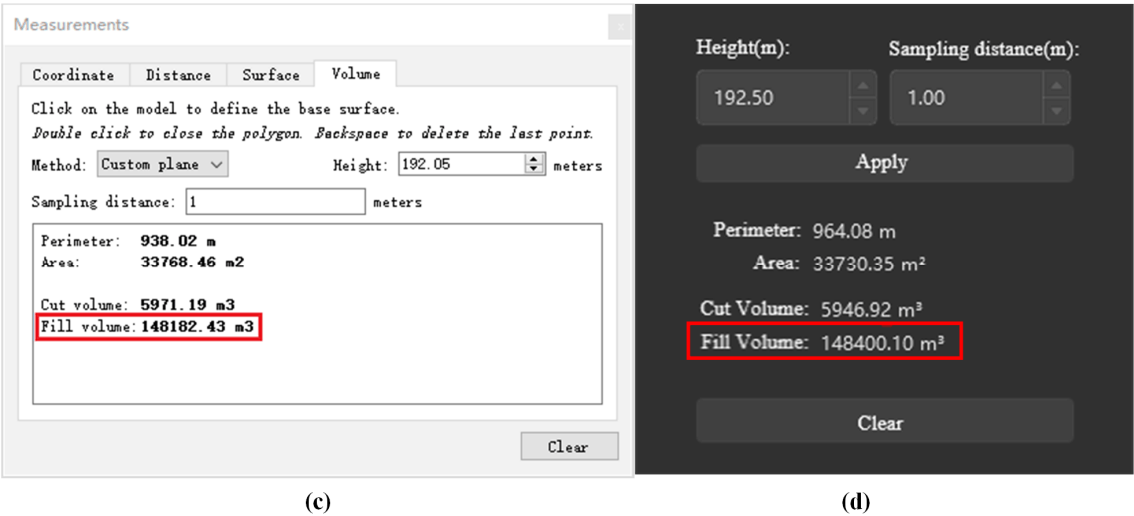

phase II.

**Figure S4.** Measured results of storage capacity based on two software: (a) ContextCapture Viewer for phase I, (b)

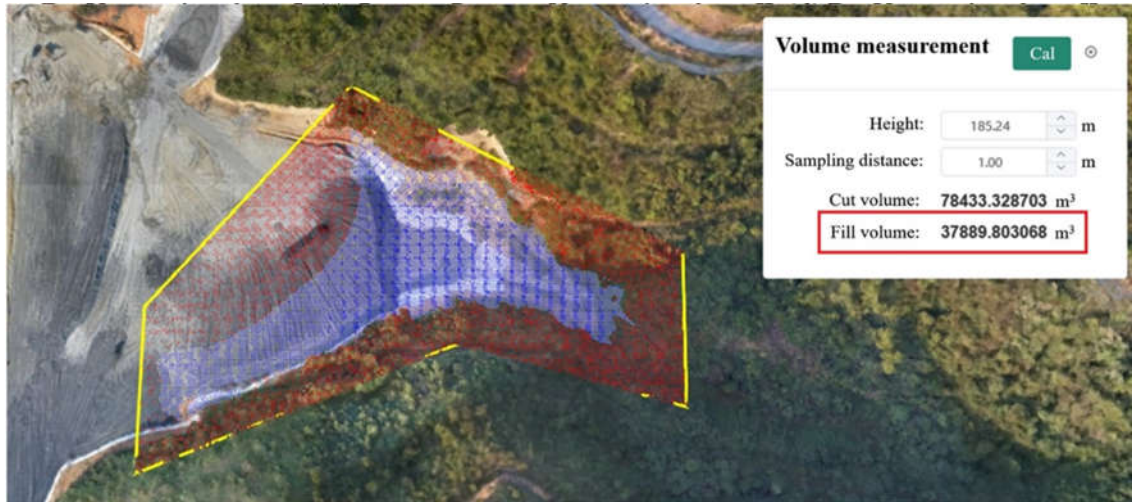

(a)

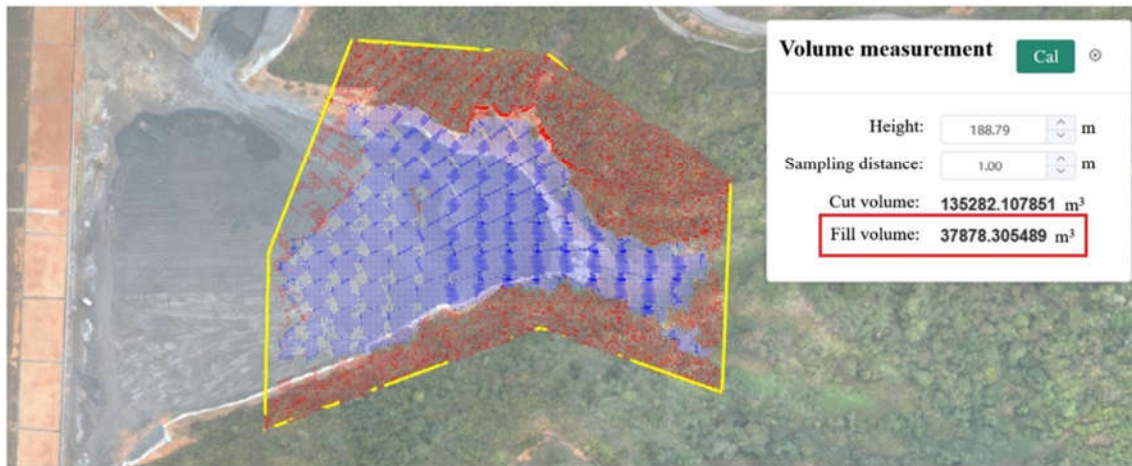

(b)



Figure S5. Measur

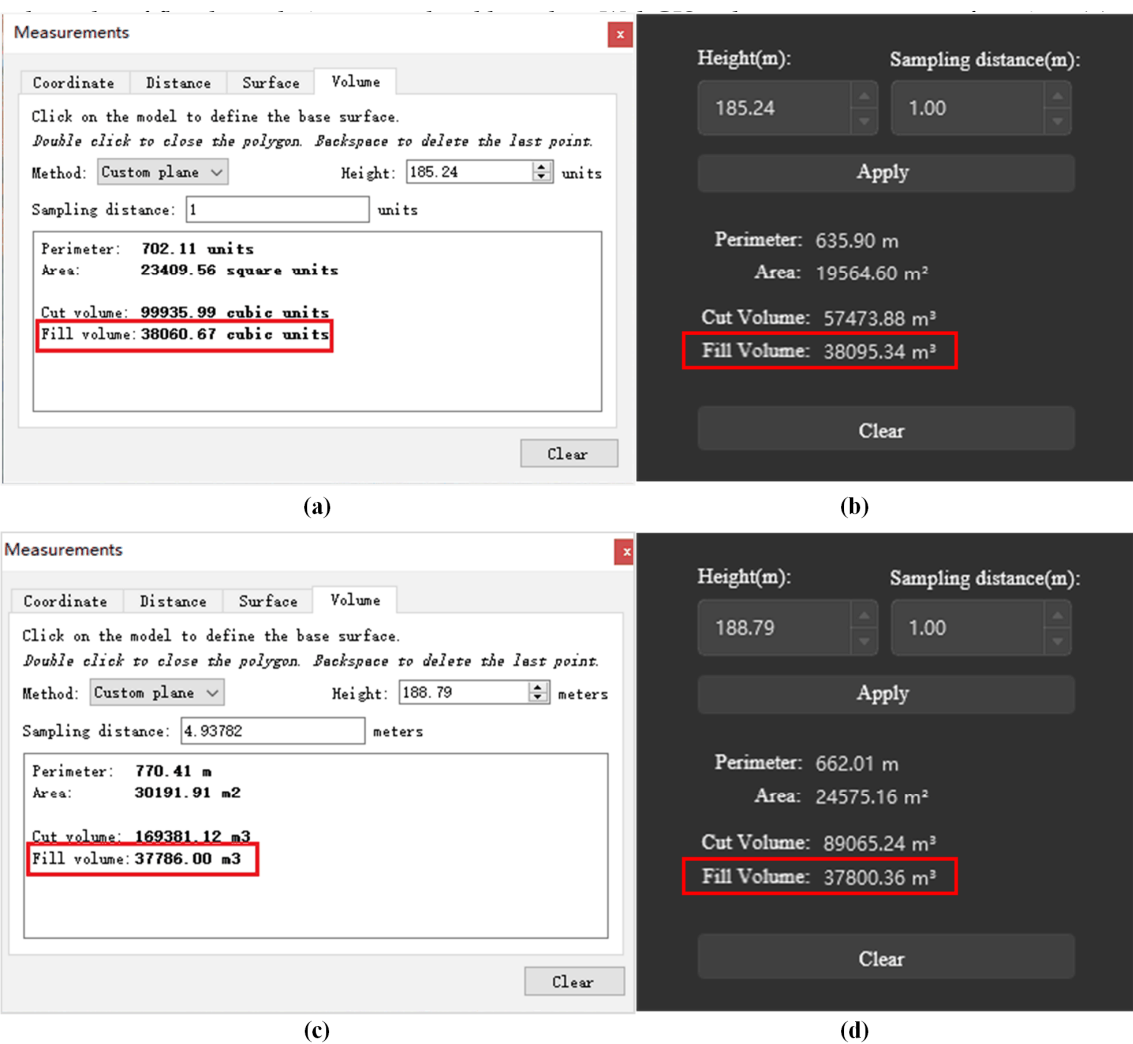

phase I, (b) phase II.

Figure S6. Measured results of flood regulation water level based on two software: (a) ContextCapture Viewer for phase I, (b) DasViewer for phase I, (c) ContextCapture Viewer for phase II, (d) DasViewer for phase II.

Reference

1. GB 39496-2020; Safety Regulation for Tailings Pond. State Administration for Market Regulation, Standardization Administration: Beijing, China, 2020.
2. Guangdong Hydrological Station. Guangdong Storm Runoff Check Calculation Chart; Guangdong Storm Runoff Check Calculation Chart: Guangdong, 1991.
